# Supplementary material
Source: Springer Nature journal article supplement (https://www.springermedizin.de/resource/supplementary/12960_2003_3_MOESM4_ESM.pdf/9569764)

**Physicians per 100,000 inhabitants**

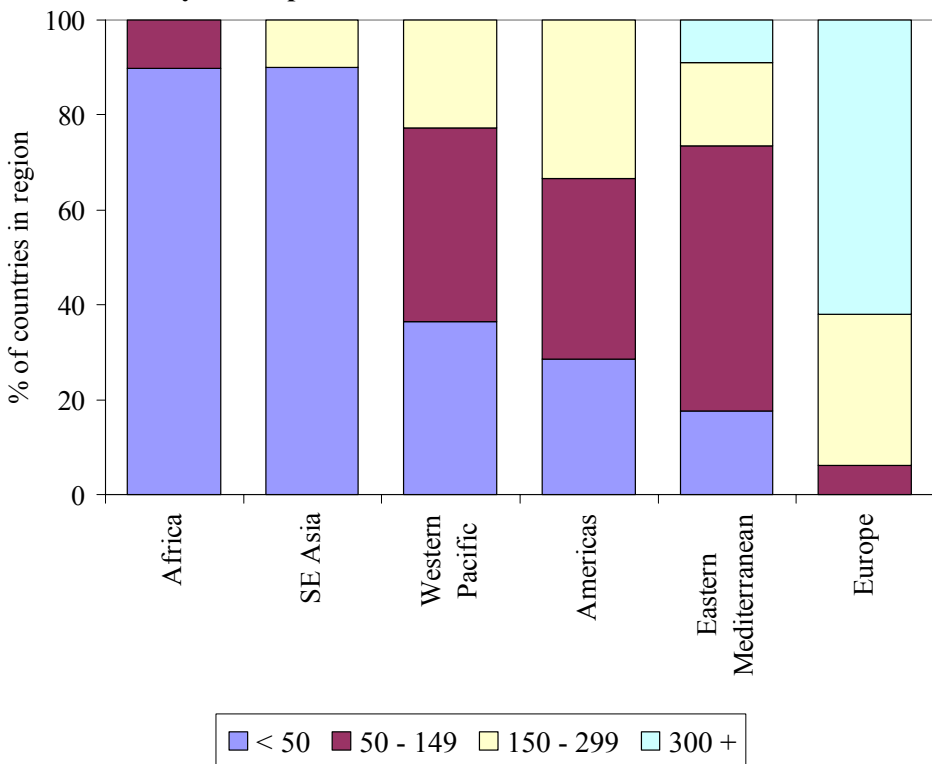

**Nurses-midwives per 100,000 inhabitants**

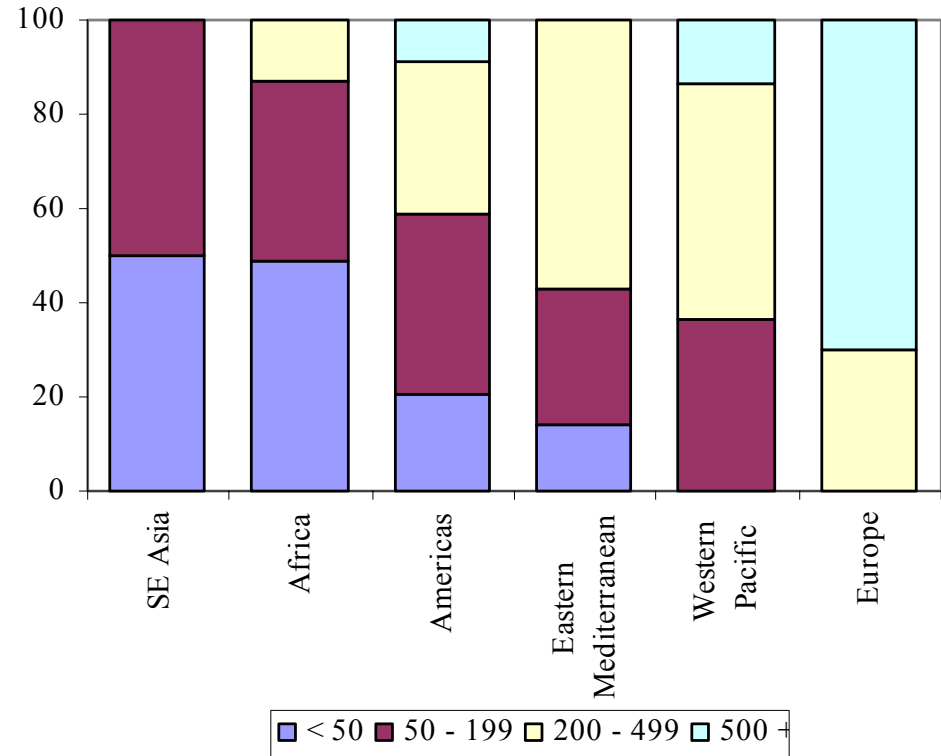

Supplement: MOESM4 [file 9569764]
